# Supplementary material for: New Insights into the Origin and Evolution of Mysmenid Spiders (Araneae, Mysmenidae) Based on the First Four Complete Mitochondrial Genomes
Source: MDPI journal article supplement (doi:10.3390/ani13030497), 2023-01-31
Supplement: s1 [file s1]

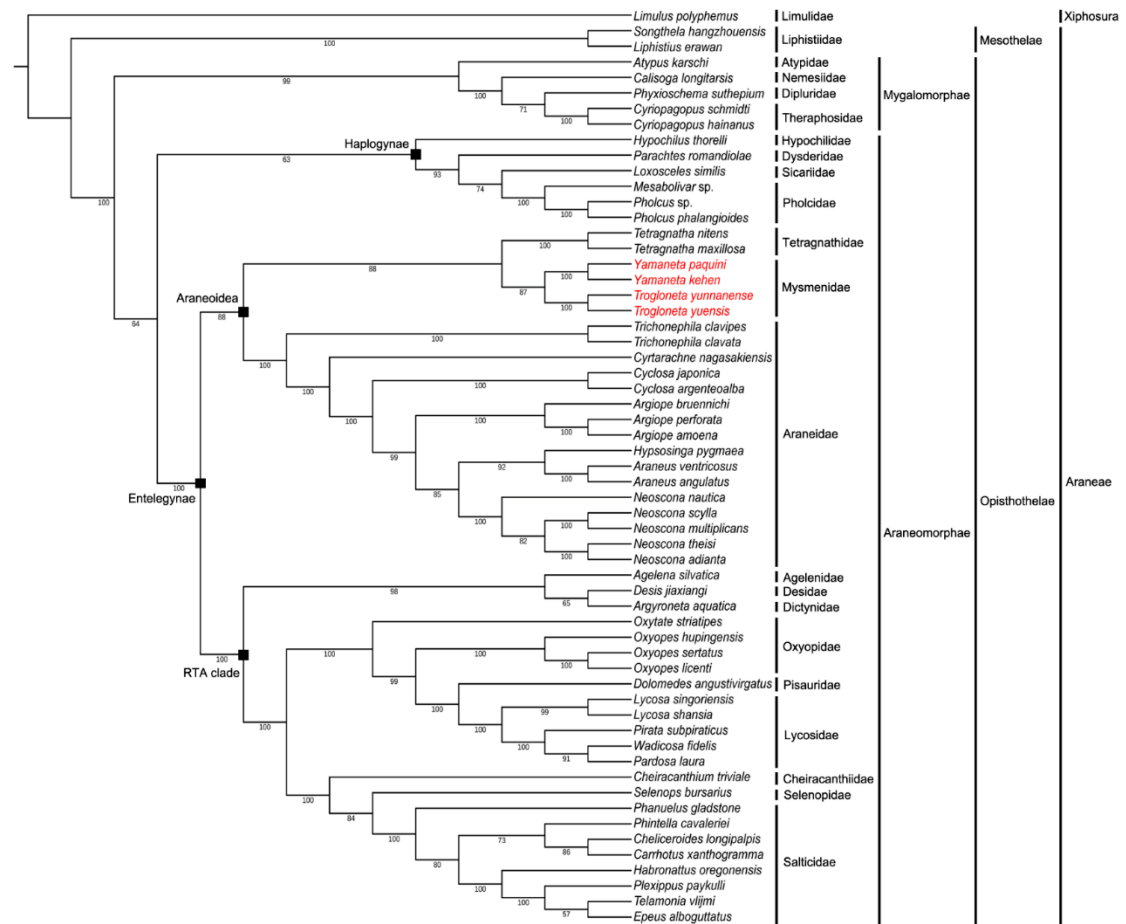

**Figure S2.** Phylogenetic tree from Araneae species based on nucleotide sequence of 13 PCGs and 2 rRNAs using maximum likelihood (ML). *Limulus polyphemus* was used as an outgroup. Numbers below the nodes referred to ML bootstrap values. The specimen used in our experiment were marked in red.
