# Supplementary material for: New Insights into the Origin and Evolution of Mysmenid Spiders (Araneae, Mysmenidae) Based on the First Four Complete Mitochondrial Genomes
Source: Animals (Basel). 2023 Jan 31;13(3):497. doi: 10.3390/ani13030497 (PMC9913698; doi:10.3390/ani13030497)
Supplement: Supplementary file 1 [file animals-13-00497-s001.zip › Table S1.xlsx]

## Sheet: Sheet1
Table S1. The best-fit models of each partition.
Mrbayes		IQTREE
Genes	Model	Genes	Model
atp6	GTR+F+I+G4	atp6	GTR+F+R10
atp8	GTR+F+I+G4	atp8	GTR+F+I+G4
cox1	GTR+F+I+G4	cox1	TIM+F+R10
cox2	GTR+F+I+G4	cox2	GTR+F+R10
cox3	GTR+F+I+G4	cox3	GTR+F+R7
cytb	GTR+F+I+G4	cytb	GTR+F+R10
nad1	GTR+F+I+G4	nad1	GTR+F+R10
nad2	GTR+F+I+G4	nad2	GTR+F+R9
nad3	GTR+F+I+G4	nad3	GTR+F+R10
nad4	GTR+F+I+G4	nad4	GTR+F+R10
nad4L	GTR+F+I+G4	nad4L	GTR+F+R6
nad5	GTR+F+I+G4	nad5	GTR+F+R10
nad6	GTR+F+I+G4	nad6	GTR+F+R10
rrnL	GTR+F+G4	rrnL	GTR+F+G4
rrnS	GTR+F+G4	rrnS	GTR+F+G4
